# Supplementary material for: Assessment of Intercostal Nerve Block Analgesia for Thoracic Surgery: A Systematic Review and Meta-analysis
Source: PubMed Central journal article supplement (PMC8593761; doi:10.1001/jamanetworkopen.2021.33394), 2021-11-15

## Supplementary Online Content

Guerra-Londono CE, Privorotskiy A, Cozowicz C, et al. Assessment of intercostal nerve block analgesia for thoracic surgery: a systematic review and meta-analysis. *JAMA Netw Open*. 2021;4(11):e2133394. doi:10.1001/jamanetworkopen.2021.33394

**eFigure 1.** Risk of Bias Assessment Across Experimental and Observational Studies

**eFigure 2.** Risk of Bias Assessments Within Each of the Coprimary Outcomes

**eFigure 3.** Forest Plots With Effect Estimates of Mean Differences in Acute Postoperative Pain Between ICNB and Other Forms of Analgesia

**eFigure 4.** Forest Plots With Effect Estimates of Mean Differences in Acute Postoperative Pain Between ICNB and Other Forms of Analgesia: Subgroup Analysis by Type of Surgery

**eFigure 5.** Forest Plots With Effect Estimates of Mean Differences in Postoperative Morphine Milligram Equivalents Between ICNB and Other Forms of Analgesia: Subgroup Analysis by Type of Surgery

**eFigure 6.** Forest Plots With Effect Estimates of Odds Ratios for Postoperative Complications Between ICNB and Other Forms of Analgesia

**eFigure 7.** Forest Plots With Effect Estimates of Odds Ratios for Postoperative Complications Between ICNB and Other Forms of Analgesia: Subgroup Analysis by Type of Surgery

**eFigure 8.** Forest Plots With Effect Estimates of Mean Differences in Postoperative Pulmonary Function Between ICNB and Other Forms of Analgesia

**eFigure 9.** Forest Plots With Effect Estimates of Mean Differences in Postoperative Pulmonary Function Between ICNB and Other Forms of Analgesia: Subgroup Analysis by Type of Surgery

**eFigure 10.** Forest Plots With Effect Estimates of Mean Differences in Length of Stay Between ICNB and Other Forms of Analgesia

**eFigure 11.** Forest Plots With Effect Estimates of Mean Differences in Length of Stay Between ICNB and Other Forms of Analgesia: Subgroup Analysis by Type of Surgery

This supplementary material has been provided by the authors to give readers additional information about their work.

**eFigure 1.** Risk of Bias Assessment Across Experimental (A) and Observational (B) Studies

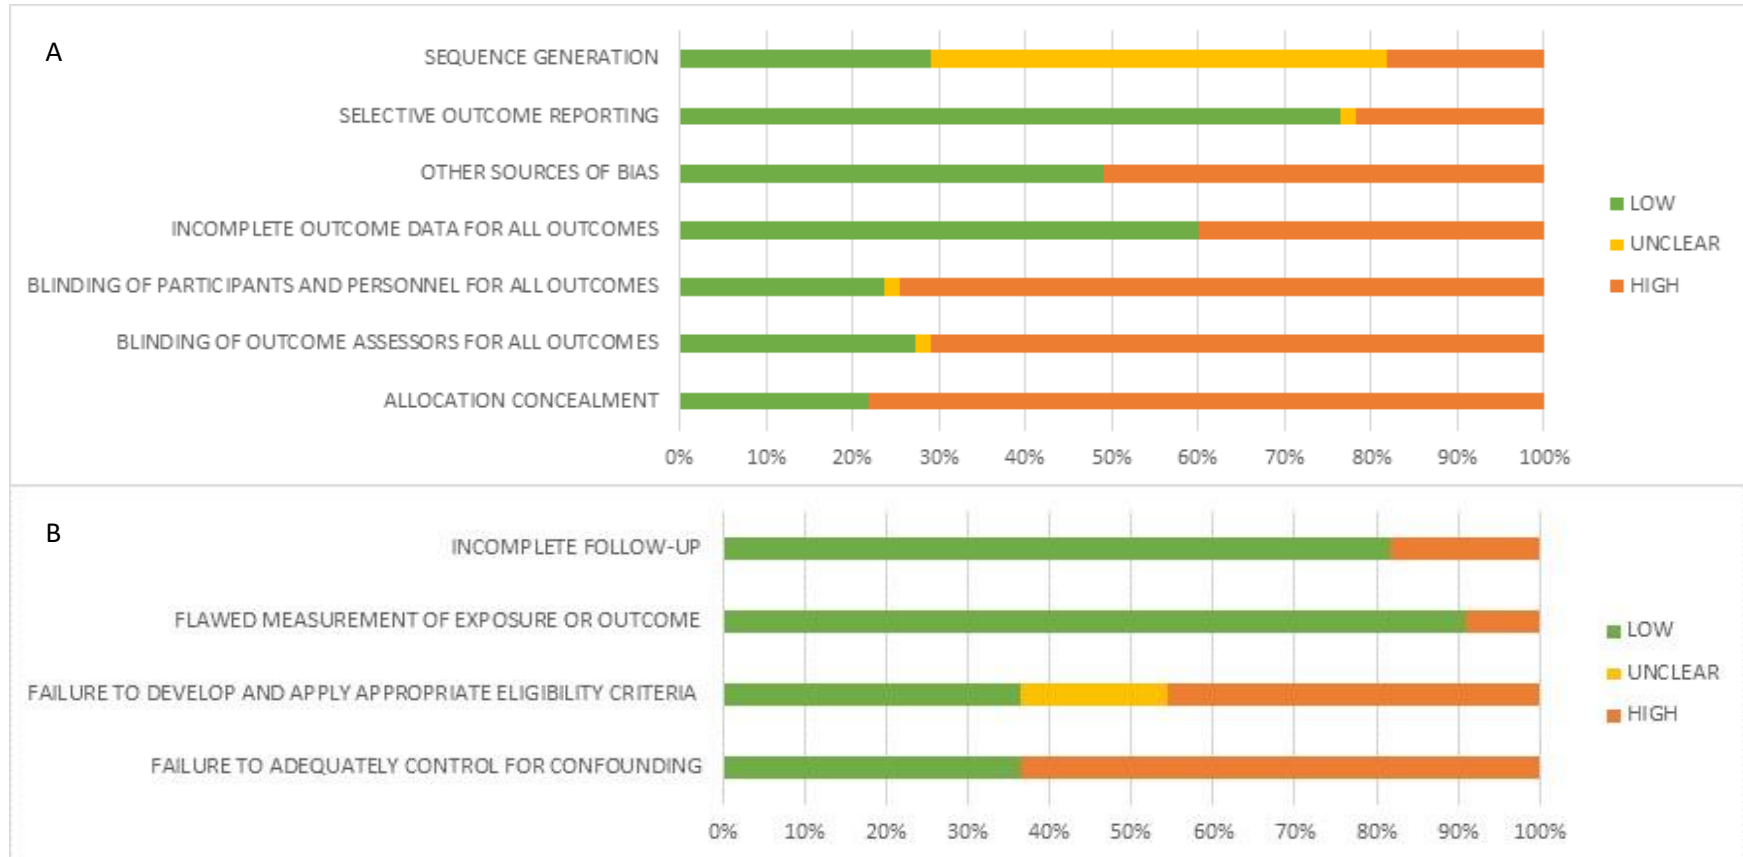

**eFigure 2. Risk of Bias Assessments Within Each of the Coprimary Outcomes**

**A. Risk of Bias Assessment for Pain in Randomized Controlled Trials: ICNB vs Systemic Analgesia**

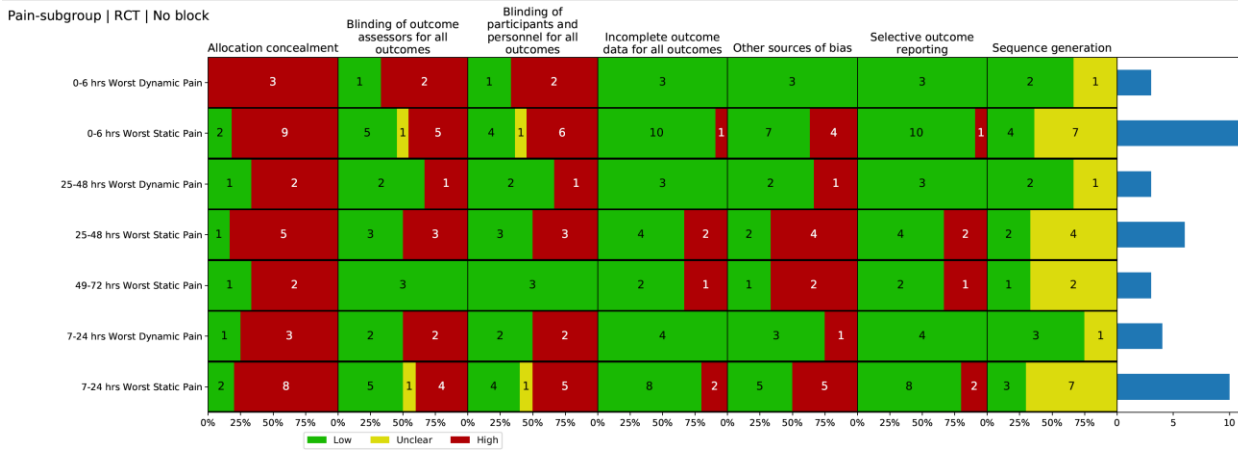

**B. Risk of Bias Assessment for Pain in Randomized Controlled Trials: ICNB vs TEA**

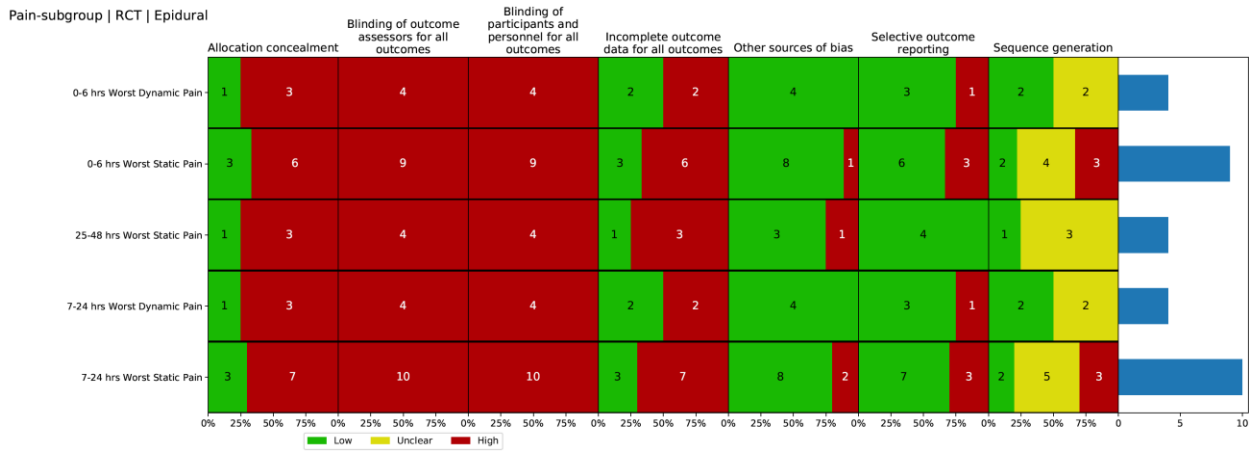

**C. Risk of Bias Assessment for Pain in Randomized Controlled Trials: ICNB vs PVB**

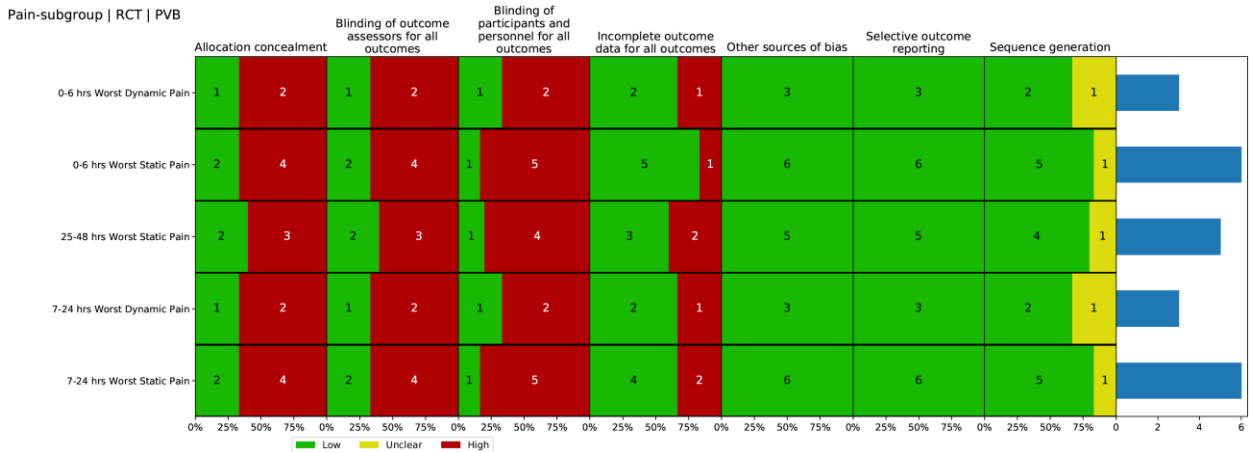

**D. Risk of Bias Assessment for Pain in Observational Studies: ICNB vs TEA**

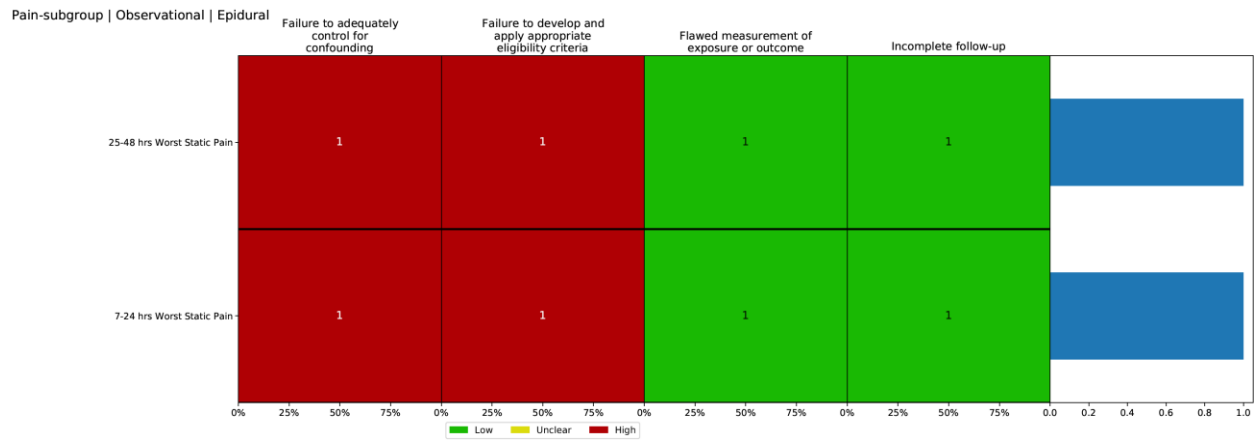

E. Risk of Bias Assessment for Pain in Observational Studies: ICNB vs PVB

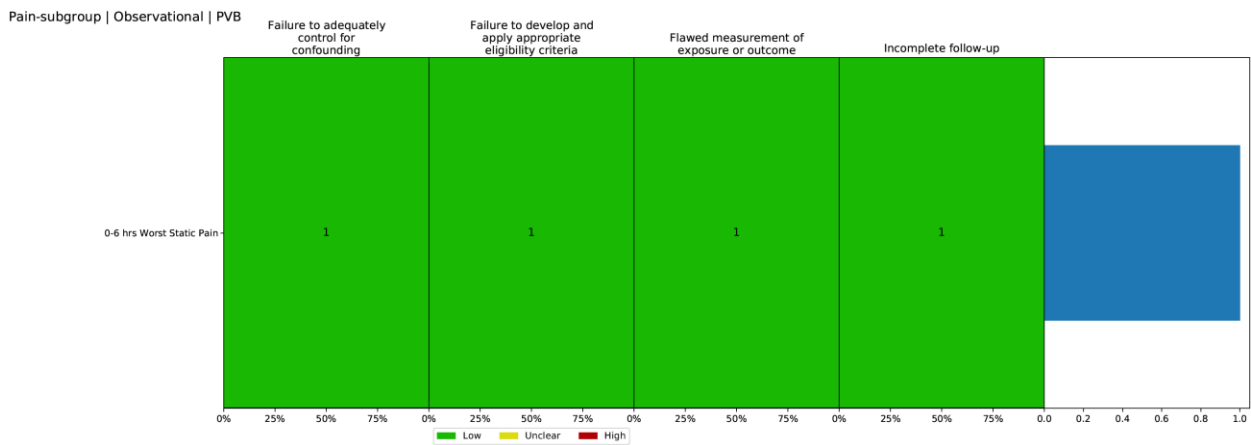

F. Risk of Bias Assessment for Opioid Consumption in Randomized Controlled Trials: ICNB vs Systemic Analgesia

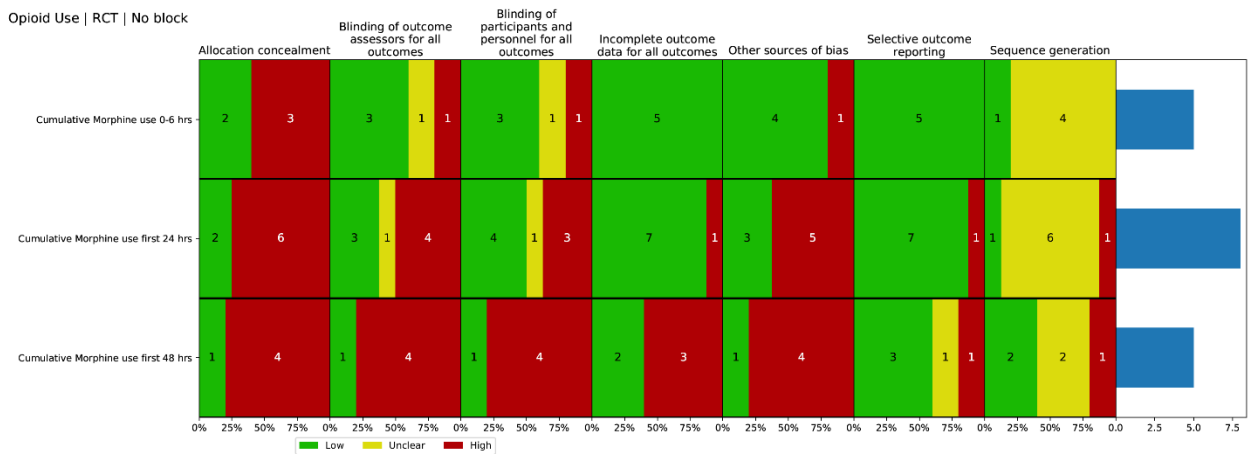

### G. Risk of Bias Assessment for Opioid Consumption in Randomized Controlled Trials: ICNB vs TEA

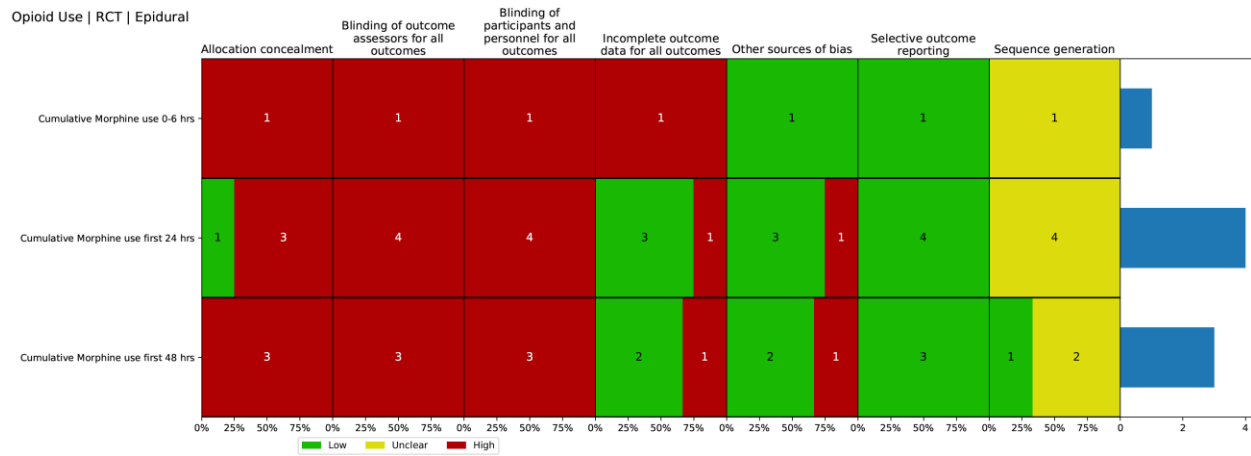

### H. Risk of Bias Assessment for Opioid Consumption in Randomized Controlled Trials: ICNB vs PVB

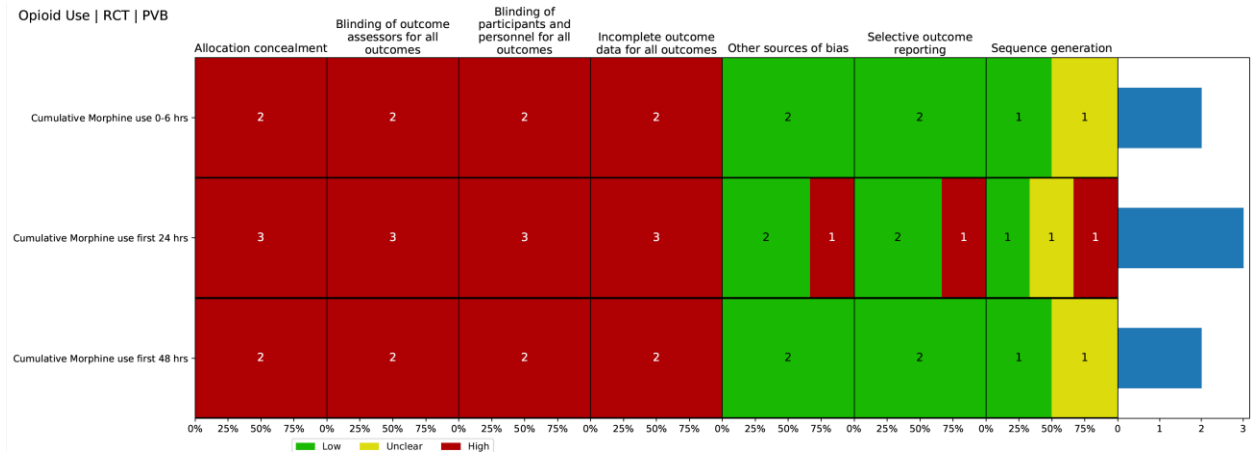

### I. Risk of Bias Assessment for Opioid Consumption in Observational Studies: ICNB vs PVB

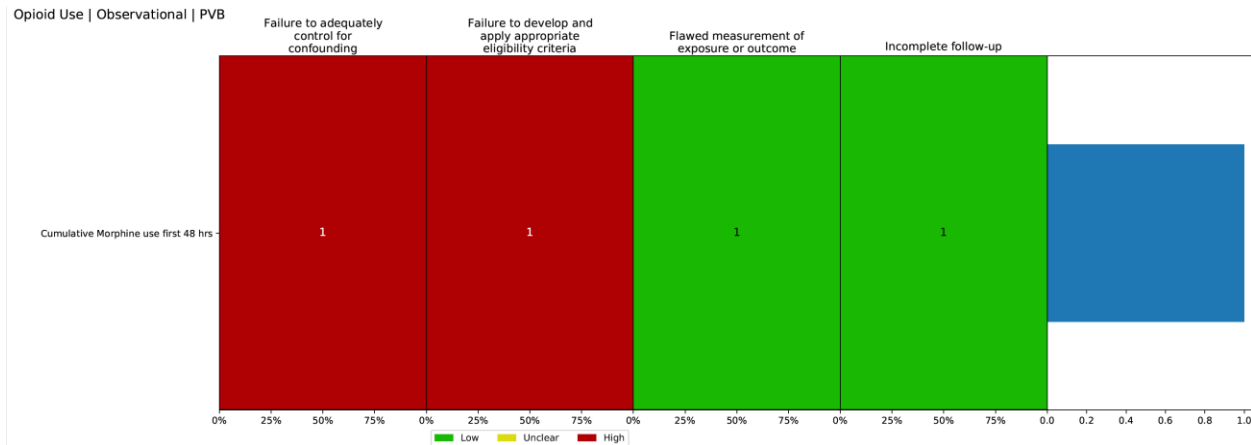

**eFigure 3.** Forest Plots With Effect Estimates of Mean Differences in Acute Postoperative Pain Between ICNB and Other Forms of Analgesia

**A.** Forest Plot With Effect Estimates of Mean Differences in Acute Postoperative Pain Between ICNB and Systemic Analgesia (double-click to open PDF)

Figure 3a. Forest Plots With Effect Estimates of Mean Differences in Acute Postoperative Pain Between ICNB and Systemic Analgesia

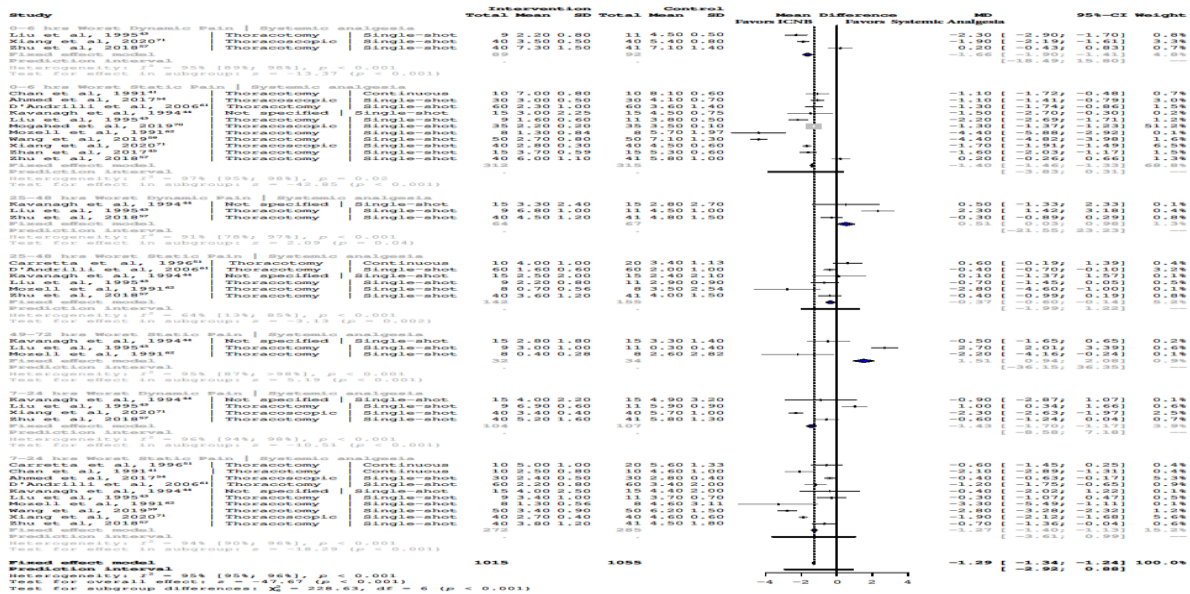



**eFigure 4.** Forest Plots With Effect Estimates of Mean Differences in Acute Postoperative Pain Between ICNB and Other Forms of Analgesia: Subgroup Analysis by Type of Surgery (double-click to open PDF)

eFigure 4. Forest Plots With Effect Estimates of Mean Differences in Acute Postoperative Pain Between ICNB and other forms of analgesia: Subgroup Analysis by Type of Surgery

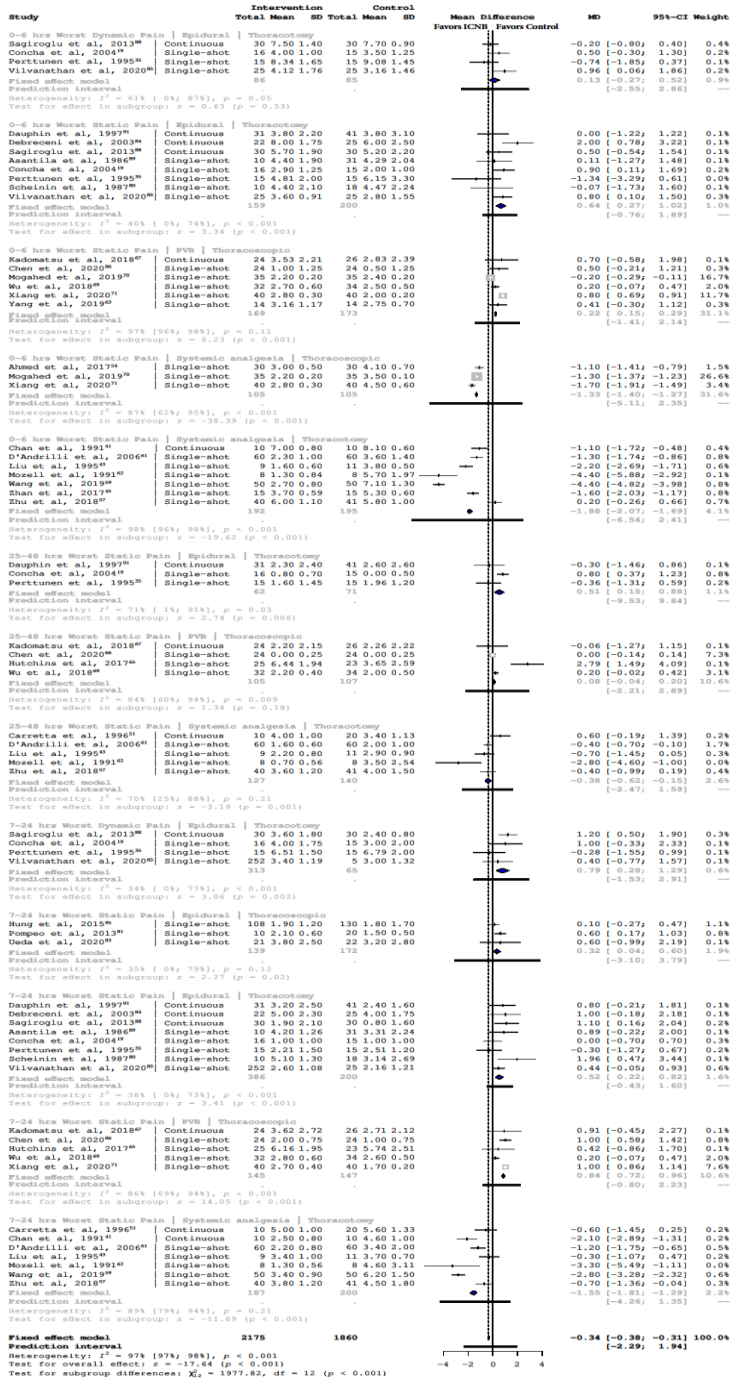



**eFigure 5.** Forest Plots With Effect Estimates of Mean Differences in Postoperative Morphine Milligram Equivalents Between ICNB and Other Forms of Analgesia: Subgroup Analysis by Type of Surgery (double-click to open PDF)

eFigure 5. Forest Plots with Effect Estimates of Mean Differences in Postoperative Morphine Milligram Equivalents (MME) Between ICNB and other forms of analgesia: Subgroup Analysis by Type of Surgery.

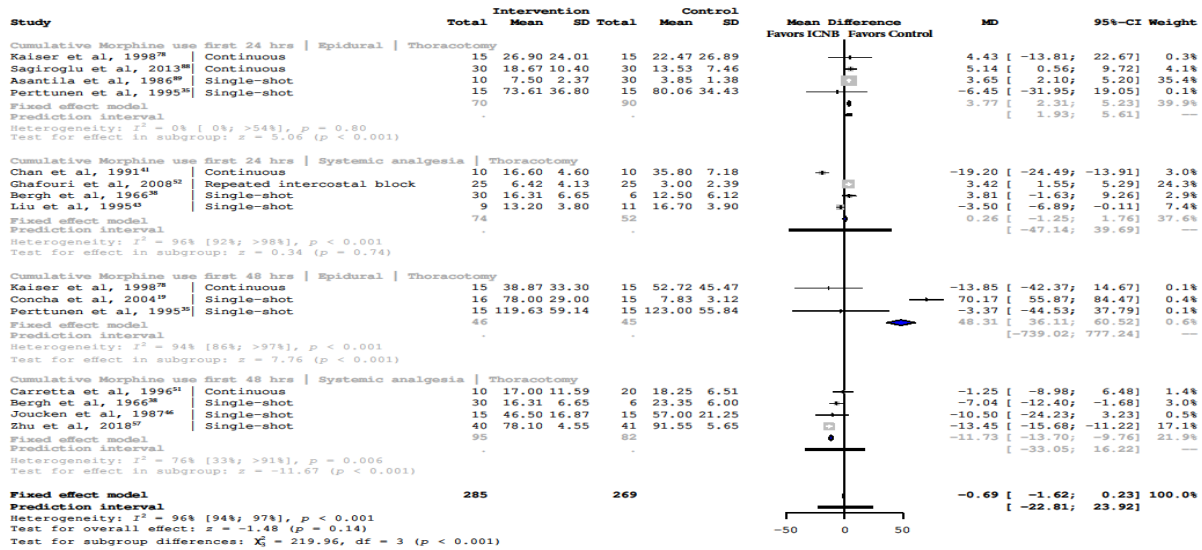

# eFigure 6. Forest Plots With Effect Estimates of Odds Ratios for Postoperative Complications Between ICNB and Other Forms of Analgesia (double-click to open PDF)

Figure 6. Forest Plots With Effect Estimates of Odds Ratios of Postoperative Complications Between ICNB and other forms of analgesia.

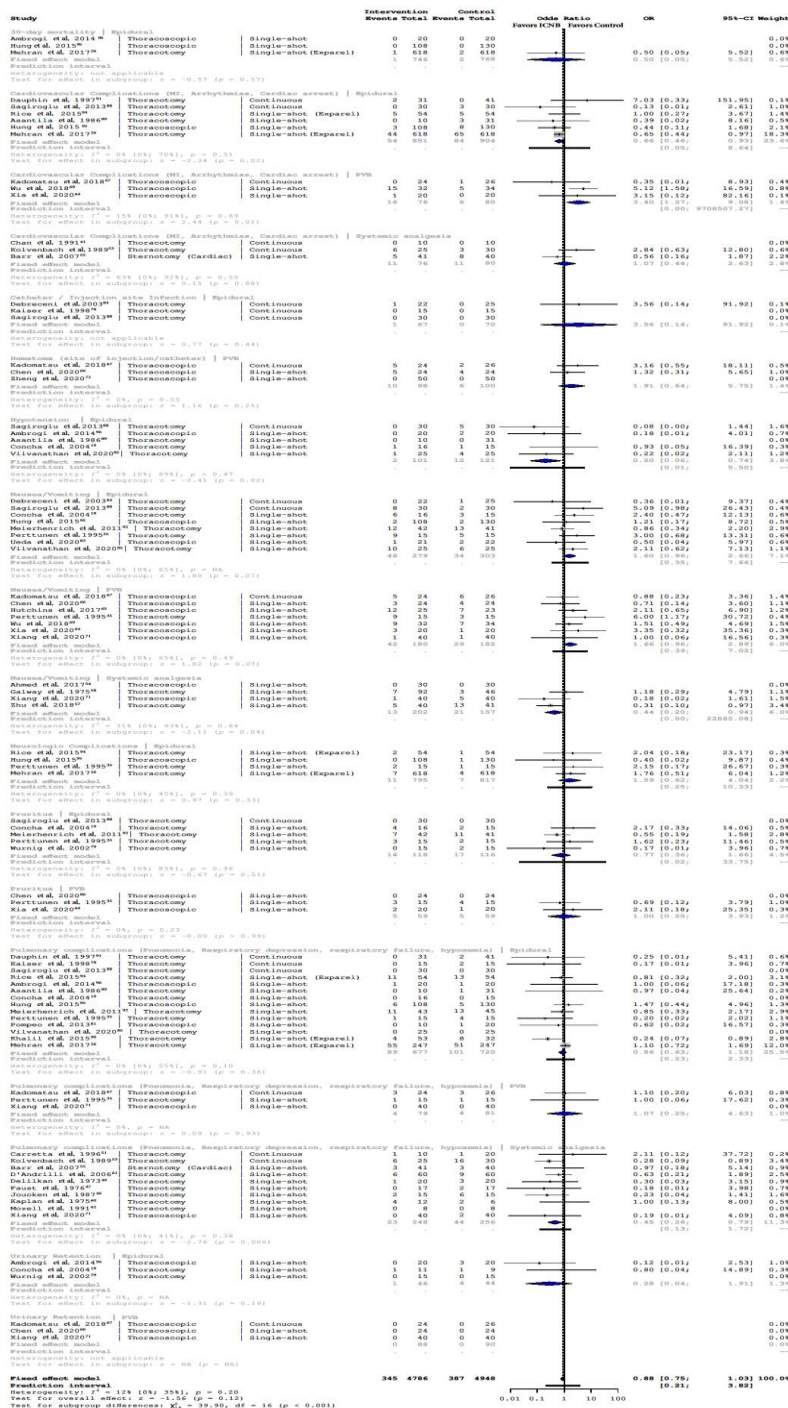

**eFigure 7. Forest Plots With Effect Estimates of Odds Ratios for Postoperative Complications Between ICNB and Other Forms of Analgesia: Subgroup Analysis by Type of Surgery (double-click to open PDF)**

**Figure 7. Forest Plots With Effect Estimates of Odds Ratios of Postoperative Complications Between ICNB and other forms of analgesia: Subgroup analysis by Type of Surgery.**

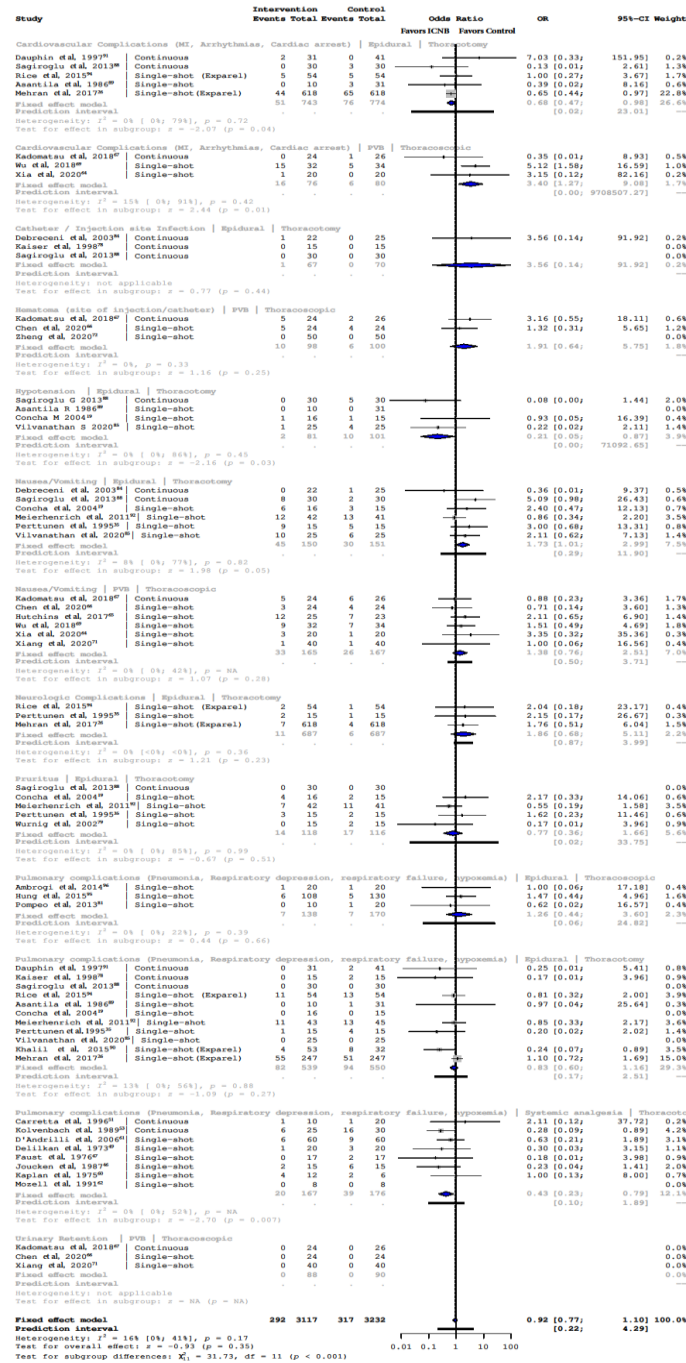

**eFigure 8.** Forest Plots With Effect Estimates of Mean Differences in Postoperative Pulmonary Function Between ICNB and Other Forms of Analgesia (double-click to open PDF)

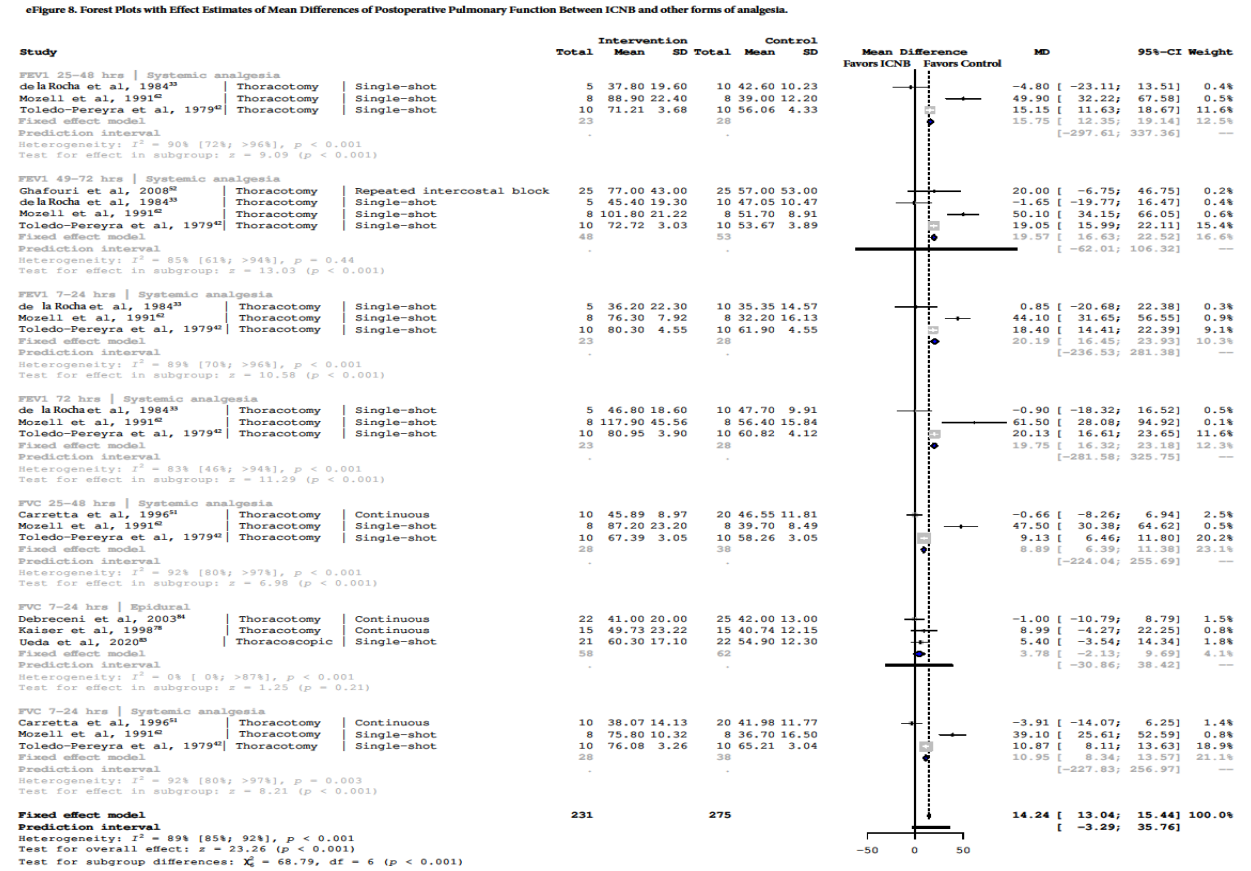

**eFigure 9.** Forest Plots With Effect Estimates of Mean Differences in Postoperative Pulmonary Function Between ICNB and Other Forms of Analgesia: Subgroup Analysis by Type of Surgery (double-click to open PDF)

Figure 9. Forest Plots With Effect Estimates of Mean Differences of Postoperative Pulmonary Function Between ICNB and other forms of Analgesia: Subgroup analysis by Type of Surgery.

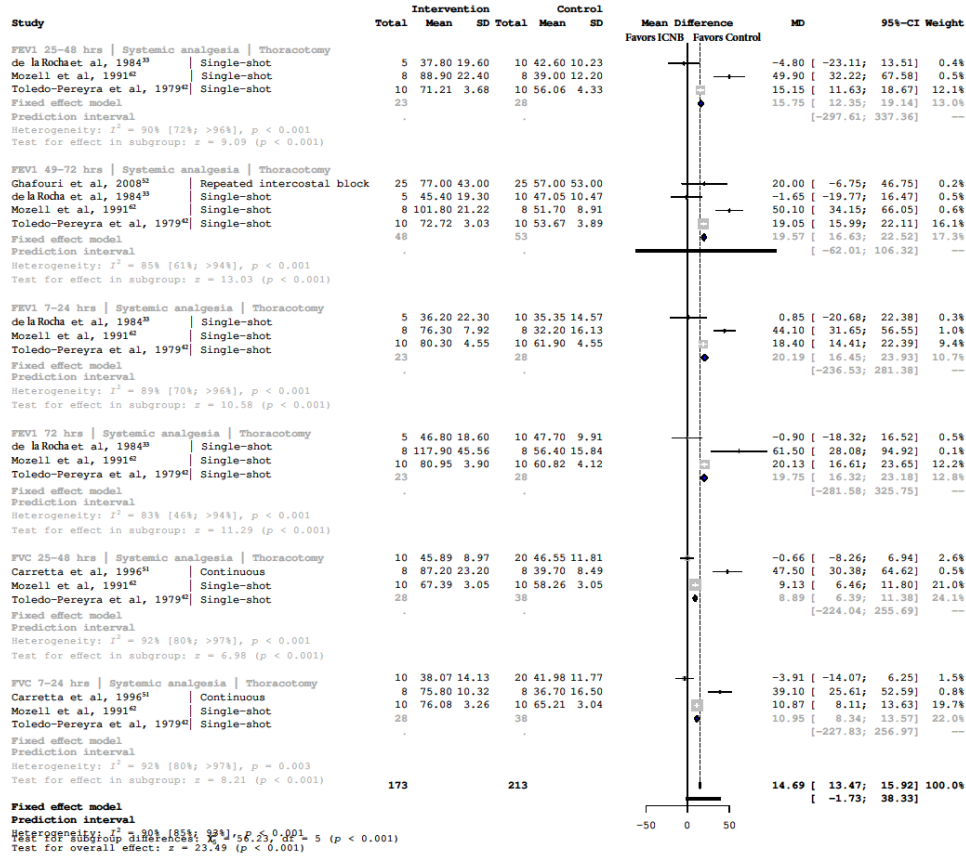

**eFigure 10.** Forest Plots With Effect Estimates of Mean Differences in Length of Stay (Hours) Between ICNB and Other Forms of Analgesia (double-click to open PDF)

eFigure 10. Forest Plots with Effect Estimates of Mean Differences of Length of Stay (hours) Between ICNB and other forms of analgesia.

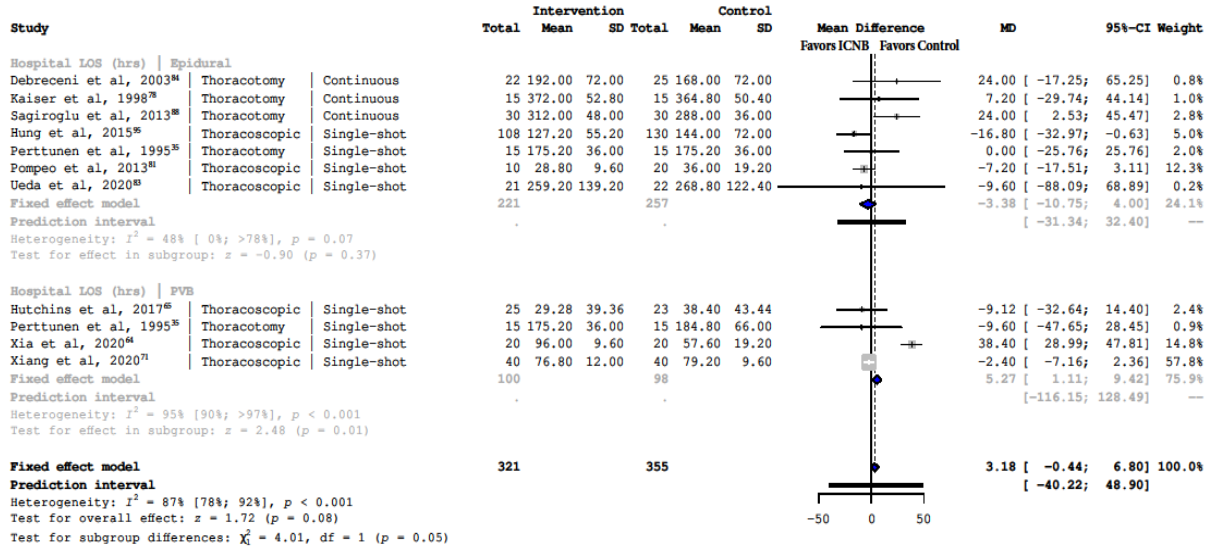

**eFigure 11.** Forest Plots With Effect Estimates of Mean Differences in Length of Stay (Hours) Between ICNB and Other Forms of Analgesia: Subgroup Analysis by Type of Surgery (double-click to open PDF)

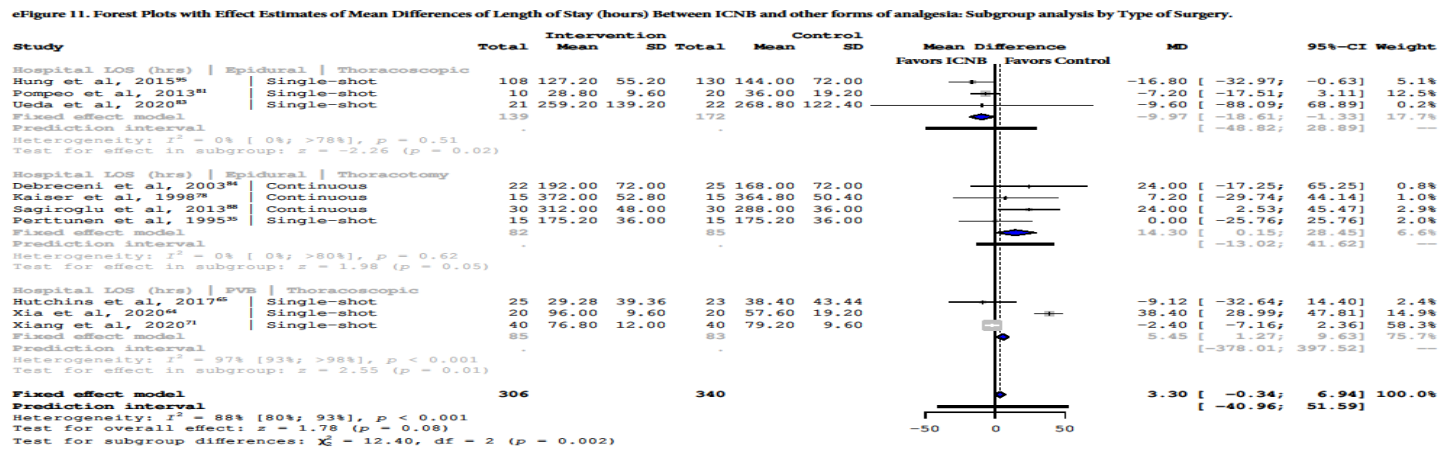

Supplement: jamanetwopen-e2133394-s001.pdf [file jamanetwopen-e2133394-s001.pdf]
